# Supplementary material for: Human papilloma virus integration sites and genomic signatures in head and neck squamous cell carcinoma
Source: PubMed Central journal article supplement (PMC9394244; doi:10.1002/1878-0261.13219), 2022-05-10

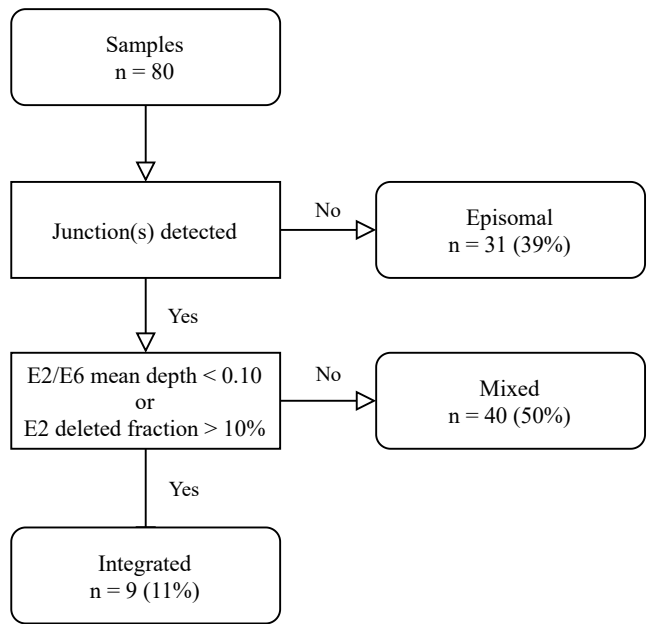

Supplement: MOL2-16-3001-s001.pdf [file MOL2-16-3001-s001.pdf]
